# Supplementary material for: Fungal-Bacterial Networks in the Populus Rhizobiome Are Impacted by Soil Properties and Host Genotype
Source: PubMed Central journal article supplement (PMC6450171; doi:10.3389/fmicb.2019.00481), 2019-03-29
Supplement: Image_1.pdf [file Image_1.pdf]

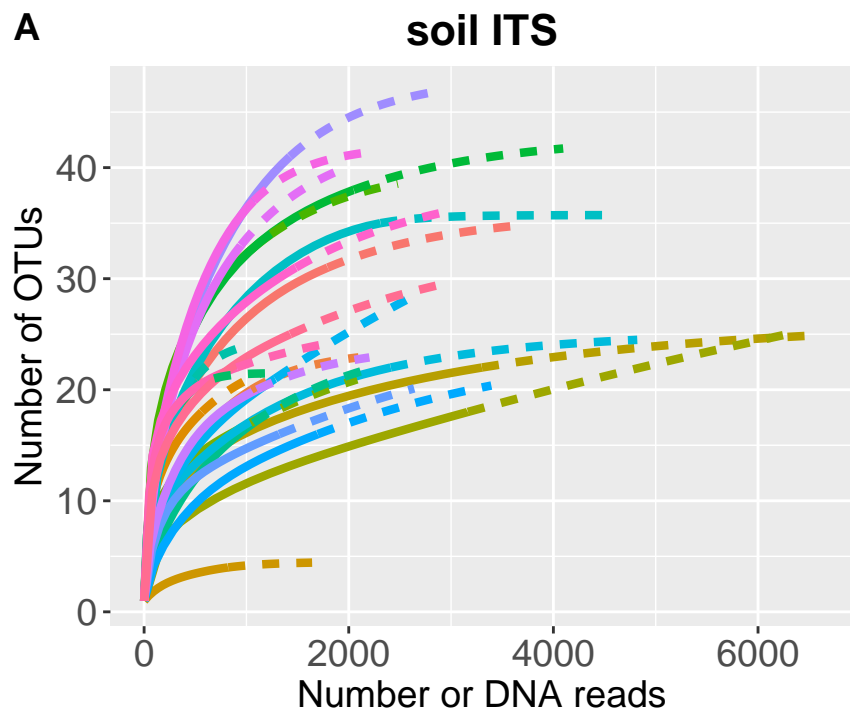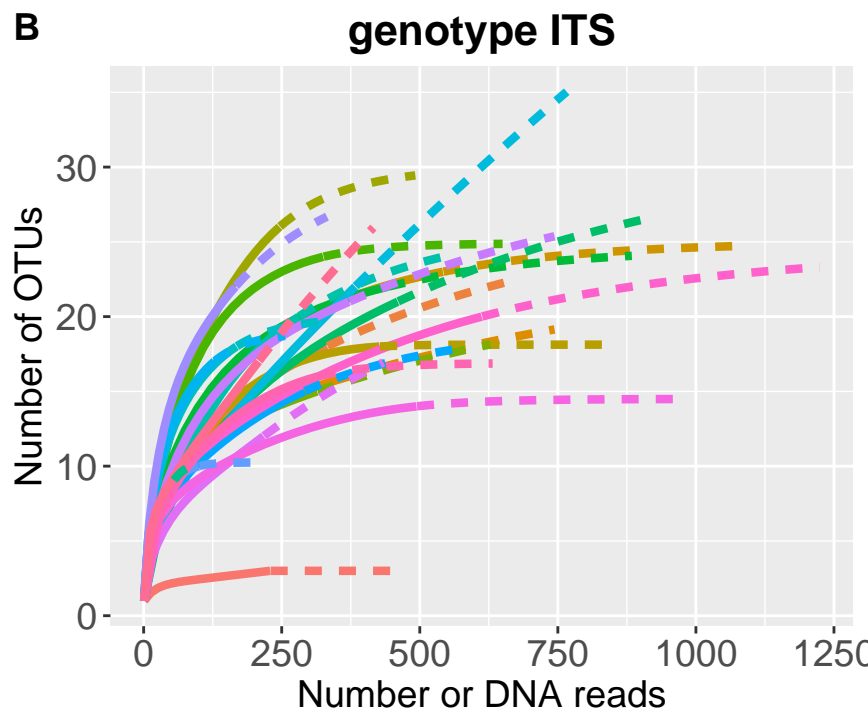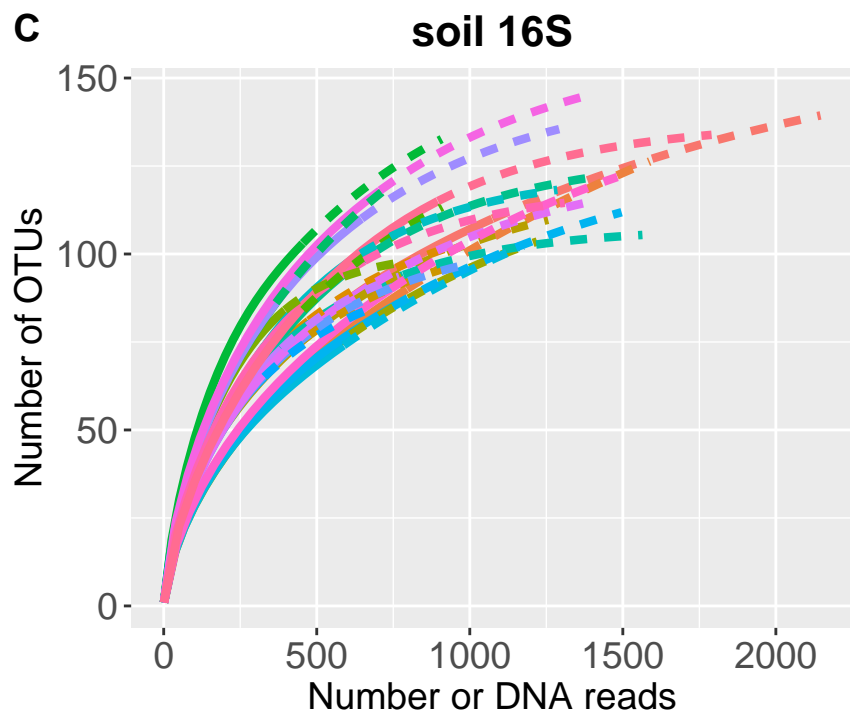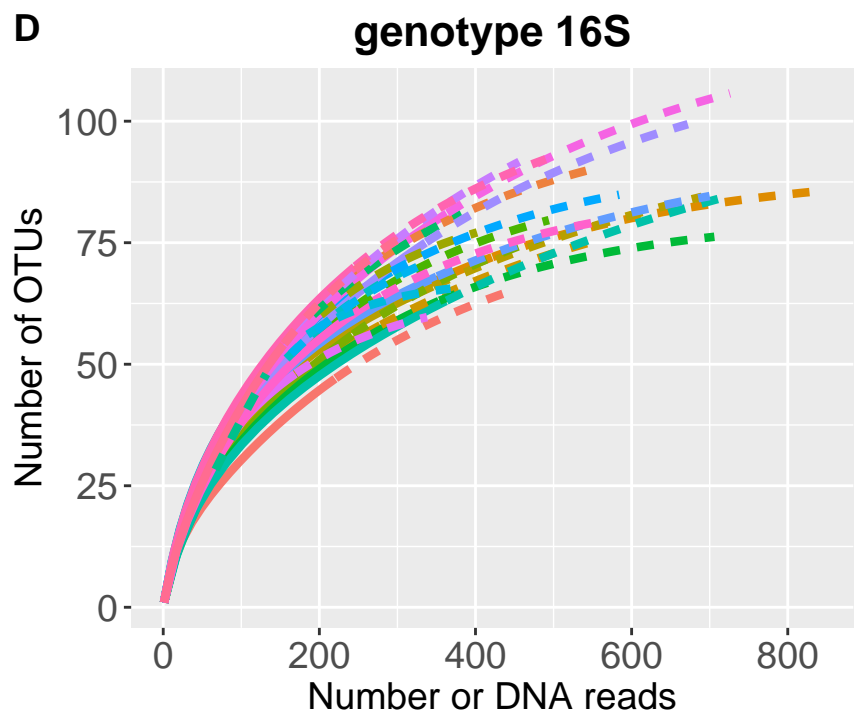

— interpolated - - - extrapolated
