# Supplementary material for: Fungal-Bacterial Networks in the Populus Rhizobiome Are Impacted by Soil Properties and Host Genotype
Source: PubMed Central journal article supplement (PMC6450171; doi:10.3389/fmicb.2019.00481), 2019-03-29
Supplement: Image_2.pdf [file Image_2.pdf]

|                | Sample $y$               | $\neg$ Sample $y$                        |
|----------------|--------------------------|------------------------------------------|
| OTU $x$        | $m_{xy}$                 | $\sum_{j \neq y} m_{xj}$                 |
| $\neg$ OTU $x$ | $\sum_{i \neq x} m_{iy}$ | $\sum_{i \neq x} \sum_{j \neq y} m_{ij}$ |
