# Supplementary material for: Fungal-Bacterial Networks in the Populus Rhizobiome Are Impacted by Soil Properties and Host Genotype
Source: PubMed Central journal article supplement (PMC6450171; doi:10.3389/fmicb.2019.00481), 2019-03-29

**A****Betweenness Distribution**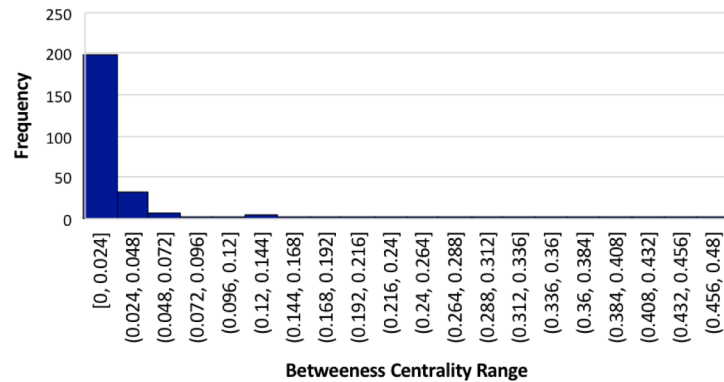**B****Topological Coefficient Distribution**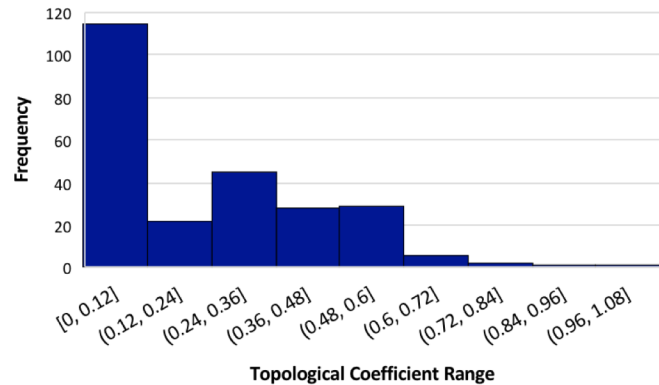**C****Degree Distribution**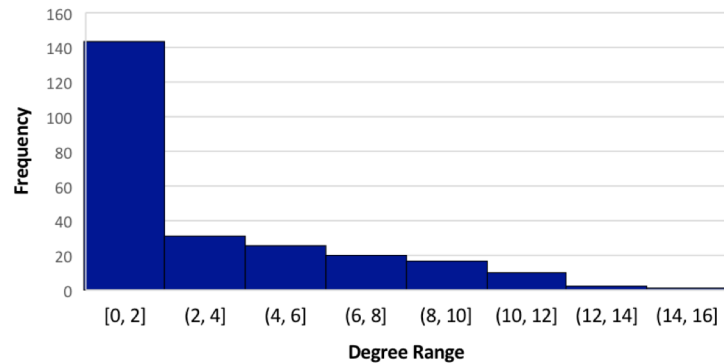**D****Clustering Coefficient Distribution**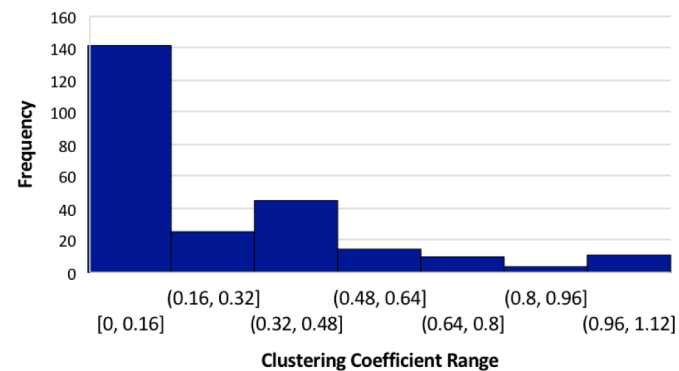

Supplement: Image_6.pdf [file Image_6.pdf]
