# Supplementary material for: Fungal-Bacterial Networks in the Populus Rhizobiome Are Impacted by Soil Properties and Host Genotype
Source: PubMed Central journal article supplement (PMC6450171; doi:10.3389/fmicb.2019.00481), 2019-03-29

**A**

Betweenness Distribution

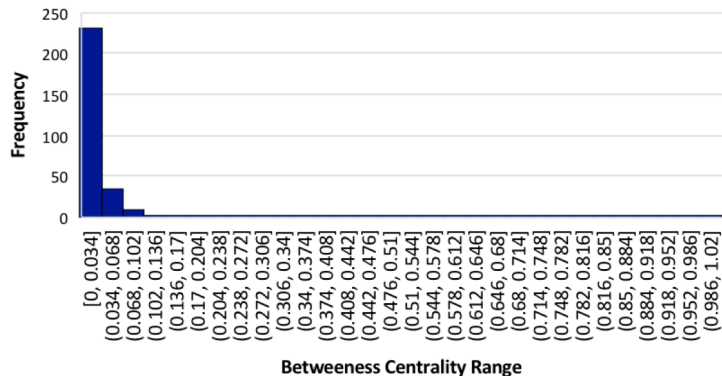**B**

Topological Coefficient Distribution

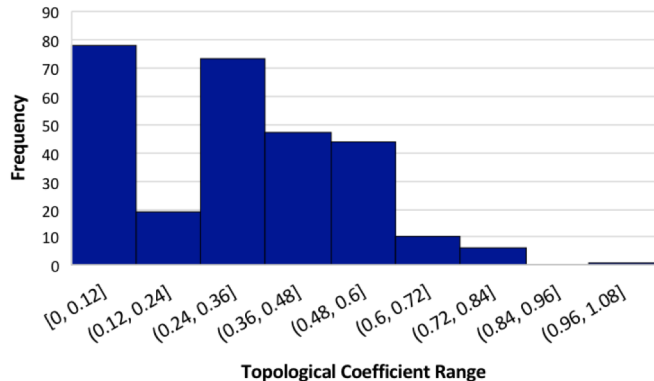**C**

Degree Distribution

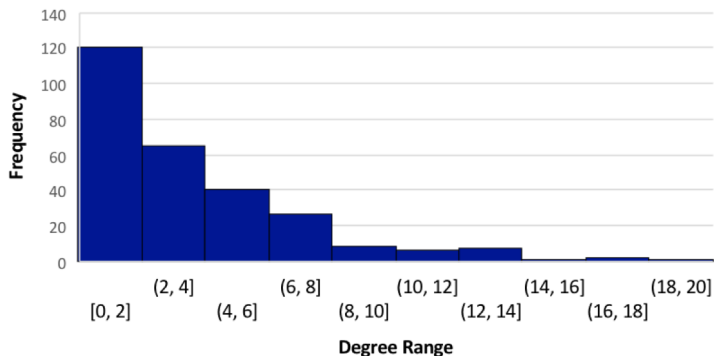**D**

Clustering Coefficient Distribution

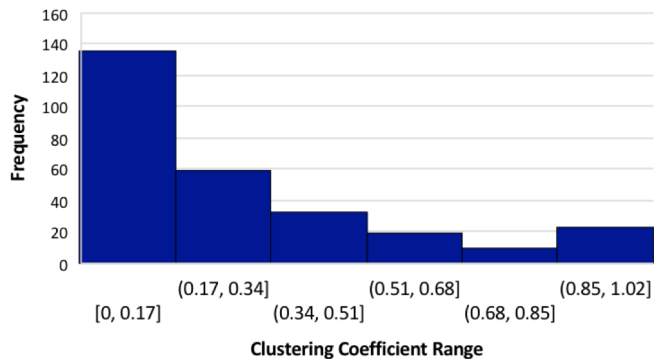

Supplement: Image_7.pdf [file Image_7.pdf]
